# Supplementary material for: Imaging functional neuroplasticity in human white matter tracts
Source: Springer Nature journal article supplement (doi:10.1007/s00429-021-02407-4), 2021-11-23
Supplement: MOESM1 [file 19892964]

## Supplemental Figures

GM analysis:

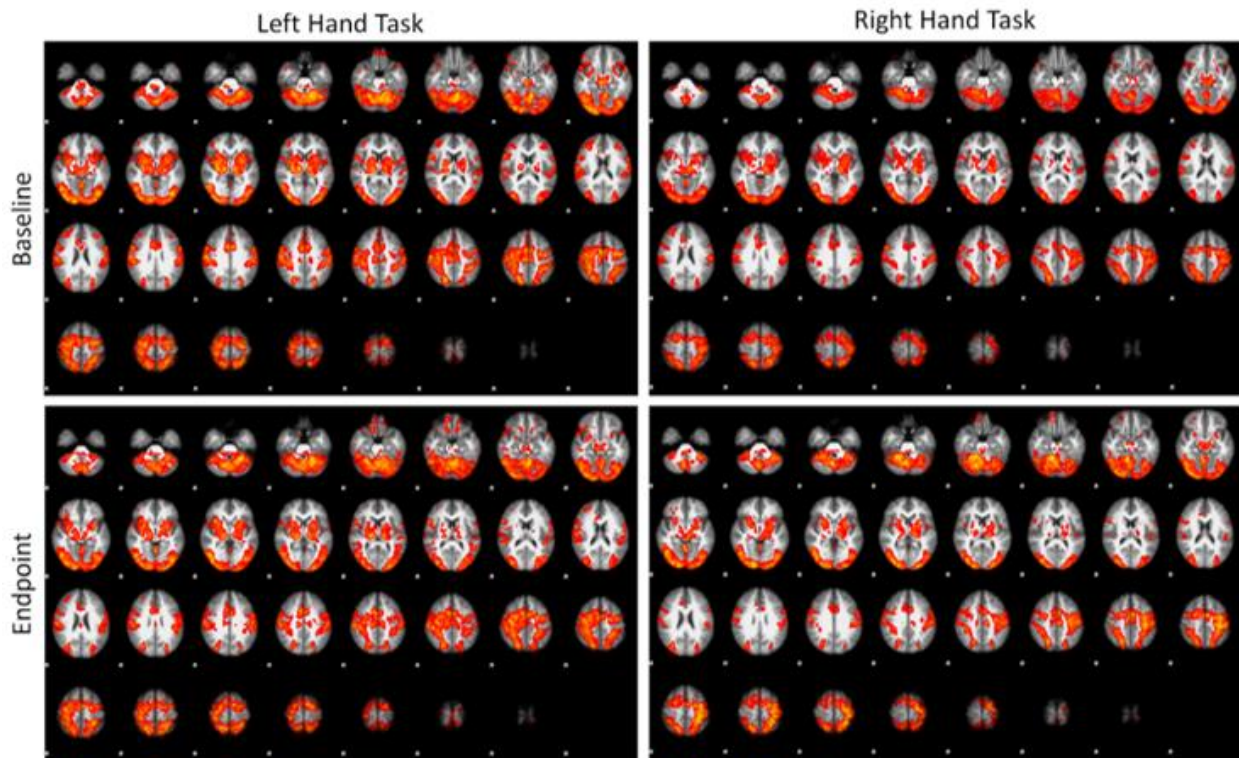

Supplementary Figure 1: Group level activation for each timepoint for each task condition ( $z > 2.5$ ,  $p < 0.05$ , two-tailed, FWE).

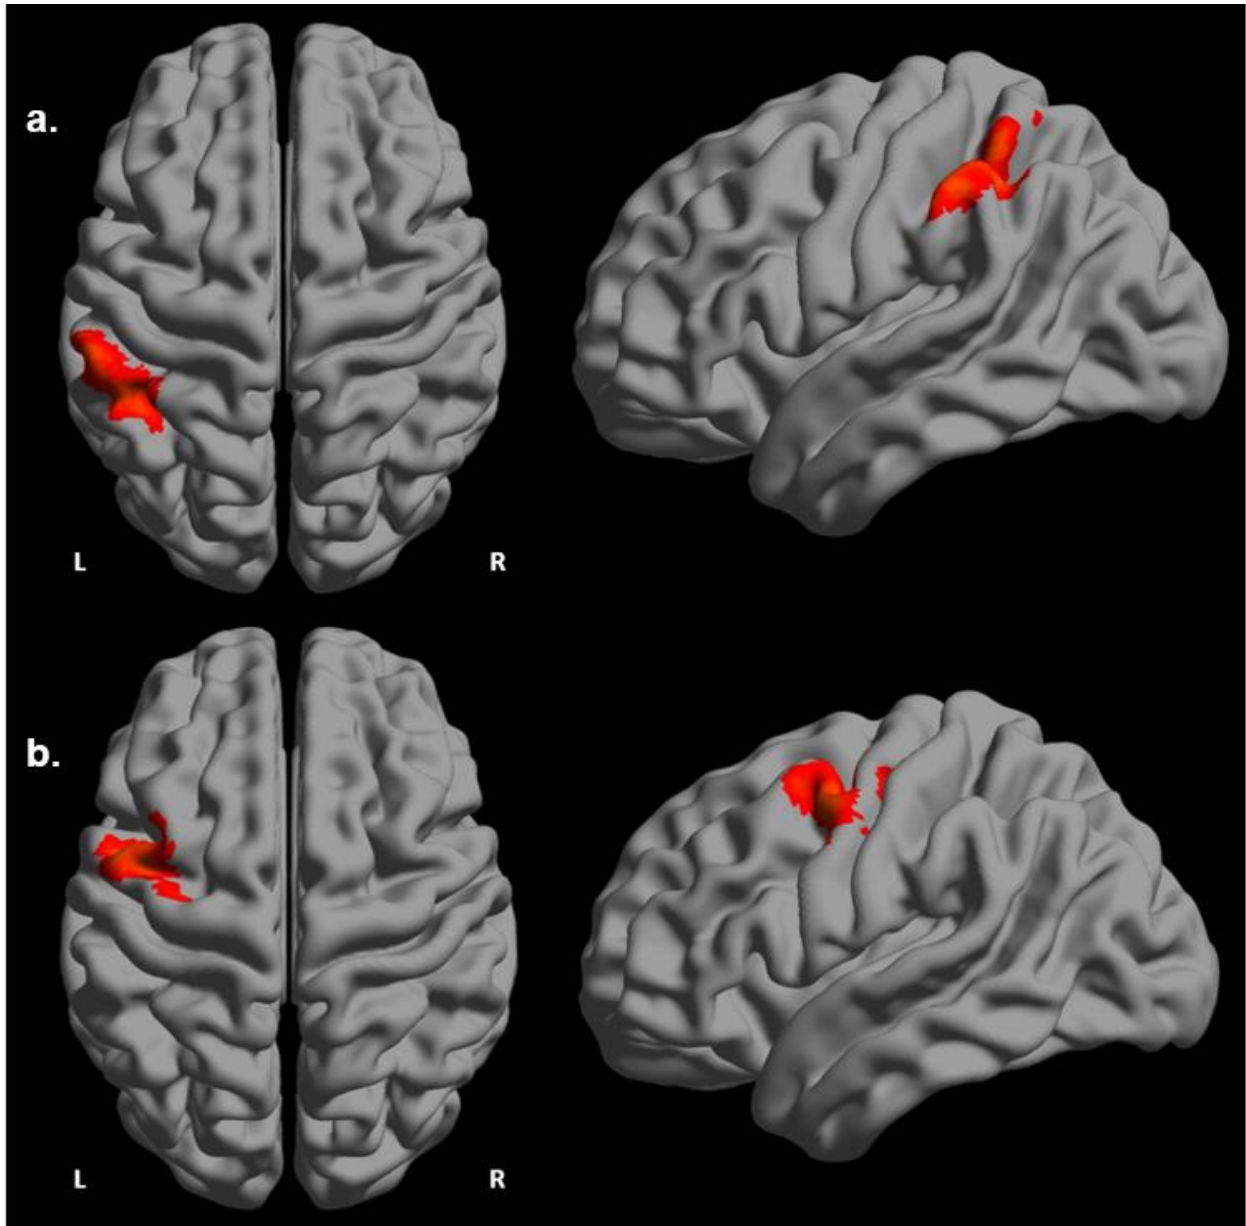

Supplementary Figure 2: Panel A - Group level difference for Baseline > Endpoint ( $p < 0.05$ , two-tailed,  $z > 3.1$ , FWE). Activation decreased in the left inferior parietal lobule for the left hand visuomotor task. Computed using FSL 6.0.0 Glm function using the canonical HRF. Panel B - Group level difference for Baseline > Endpoint ( $p < 0.05$ , two-tailed,  $z > 3.1$ , FWE). Activation decreased in the left precentral gyrus for the right hand visuomotor task. Computed using FSL 6.0.0 Glm function using the canonical HRF.
